# Supplementary material for: Fluorine on fluorenes
Source: Royal Society of Chemistry journal article supplement (doi:10.1039/d2ob01798a), 2022-01-01

*Supporting Information*

*for*

**Fluorine on Fluorenes**

Cody F. Dickinson,<sup>a</sup> Justin K. Yang,<sup>a</sup> and Marcus A. Tius<sup>\*,a</sup>

<sup>a</sup>Chemistry Department, University of Hawaii at Manoa, Honolulu, Hawaii 96822, United States

\*Email: [tius@hawaii.edu](mailto:tius@hawaii.edu)

*Contents*

|                                                                                               |    |
|-----------------------------------------------------------------------------------------------|----|
| 1. General Methods .....                                                                      | 2  |
| 2. Pyrolysis of Anhydride <b>3</b> .....                                                      | 3  |
| 3. Synthesis of 1,8-difluorofluorenone ( <b>6</b> ).....                                      | 4  |
| 4. Synthesis of 2,7-dibromo-1,8-difluoro-9 <i>H</i> -fluoren-9-one ( <b>8</b> ) .....         | 5  |
| 5. Synthesis of 2,4,5,7-tetrabromo-1,8-difluoro-9 <i>H</i> -fluoren-9-one ( <b>14</b> ) ..... | 6  |
| 6. Synthesis of 3,14-dibromo-4,13-difluorodibenzo[ <i>g,p</i> ]chrysene ( <b>13</b> ) .....   | 7  |
| 7. 3,14-dibromo-5,12-difluorodibenzo[ <i>g,p</i> ]chrysene ( <b>19</b> ) .....                | 9  |
| 8. References .....                                                                           | 11 |
| 9. NMR Spectra .....                                                                          | 12 |

## 1. General Methods

All moisture and air sensitive reactions were performed under an argon atmosphere in oven-dried or flame-dried glassware. Tetrahydrofuran (THF), dichloromethane (DCM), and diethyl ether (Et<sub>2</sub>O) were dried using a Glass Contour solvent purification system. Toluene (PhMe) was purchased from Fisher (ACS Grade) and used without further purification. <sup>1</sup>H NMR and <sup>13</sup>C NMR spectra were measured on a Varian Mercury-300 (300 MHz/75 MHz), Varian INOVA-500 (500 MHz/125 MHz), or Agilent 600 DD2 (600 MHz/150 MHz) spectrometers at ambient temperature. Chemical shifts are reported in parts per million (ppm) and are referenced to the solvent (e.g., δ 7.26 for CHCl<sub>3</sub>; δ 77.0 for CDCl<sub>3</sub>). <sup>19</sup>F NMR spectra were measured on a Varian Mercury-300 (282 MHz), Varian INOVA-500 (470 MHz), or an Agilent 600 DD2 (564 MHz) spectrometer and reported in ppm relative to TFA (−76.5 ppm). Multiplicities are indicated as follows: br (broadened), s (singlet), d (doublet), t (triplet), q (quartet), pent (pentet), sext (sextet), sept (septet), etc. or m (multiplet). Coupling constants (*J*) are reported in Hertz (Hz). Infrared (IR) spectra were recorded on a Shimadzu IRAffinity-1 Fourier transform or a ThermoFisher Nicolet Summit FTIR spectrophotometer. High-resolution mass spectra (HRMS) were obtained with an Agilent 1100 quaternary LC system. Compounds requiring electron impact (EI<sup>+</sup>) ionization were obtained at the University of Illinois Mass Spectrometry Laboratory. Melting points (m.p.) were recorded on a DigiMelt MPA160 instrument and are uncorrected. Thin layer chromatography (TLC) was performed on glass plates, 250 μm, particle size 5–17 μm, pore size 60 Å. All reactions were monitored by TLC and analyzed under UV (254 and/or 365 nm) light and visualized using either PAA, KMnO<sub>4</sub>, PMA, DNP, or AgNO<sub>3</sub> stains. Flash column chromatography was performed on silica gel, 200–400 mesh or premium silica gel, 60 Å, 40–75 μm. Purity and homogeneity of all materials was determined by TLC, <sup>1</sup>H NMR, <sup>13</sup>C NMR, <sup>19</sup>F NMR and LCMS. Dibromodimethylhydantoin (DBDMH) was purchased from AK Scientific (98%) and used without purification. Triflic acid was purchased from Oakwood Chemical and distilled prior to use.

















## 8. References

1. H. Gong, H. Zeng, F. Zhou and C.-J. Li, *Angew. Chem. Int. Ed.*, 2015, **54**, 5718–5721.
2. E. H. Huntress, I. S. Cliff, *J. Am. Chem. Soc.*, 1933, **55**, 2559–2567.
3. J. Cornelia, C. Sanchez, D. Banawa and I. Larrosa, *Chem. Commun.* 2009, 7176–7178.
4. C. F. Dickinson, J. K. Yang, G. P. A. Yap, M. A. Tius, *Org. Lett.*, 2022, **24**, 5095–5098.
5. R. Boukherroub, C. Chatgililoglu, G. Manuel, *Organometallics*, 1996, **15**, 1508–1510.
6. S. Zhou, Y. Zhou, H. Tian, Y. Zhu, Y. Pan, F. Zhou, Q. Zhang, Z. Shen, X. Fan, *J. Polym. Sci. A1*, 2014, **52**, 1519–1524.
7. D. X. Chen, C. M. Ho, Q. Y. Rudy, P. R. Wu, F. M. Wong, W. Wu, *Tetrahedron Lett.* 2008, **49**, 4147–4148.





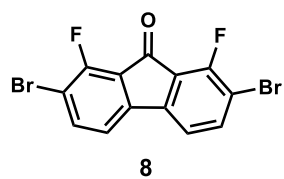

$^{19}\text{F}$  NMR (564 MHz,  $\text{CDCl}_3$ )

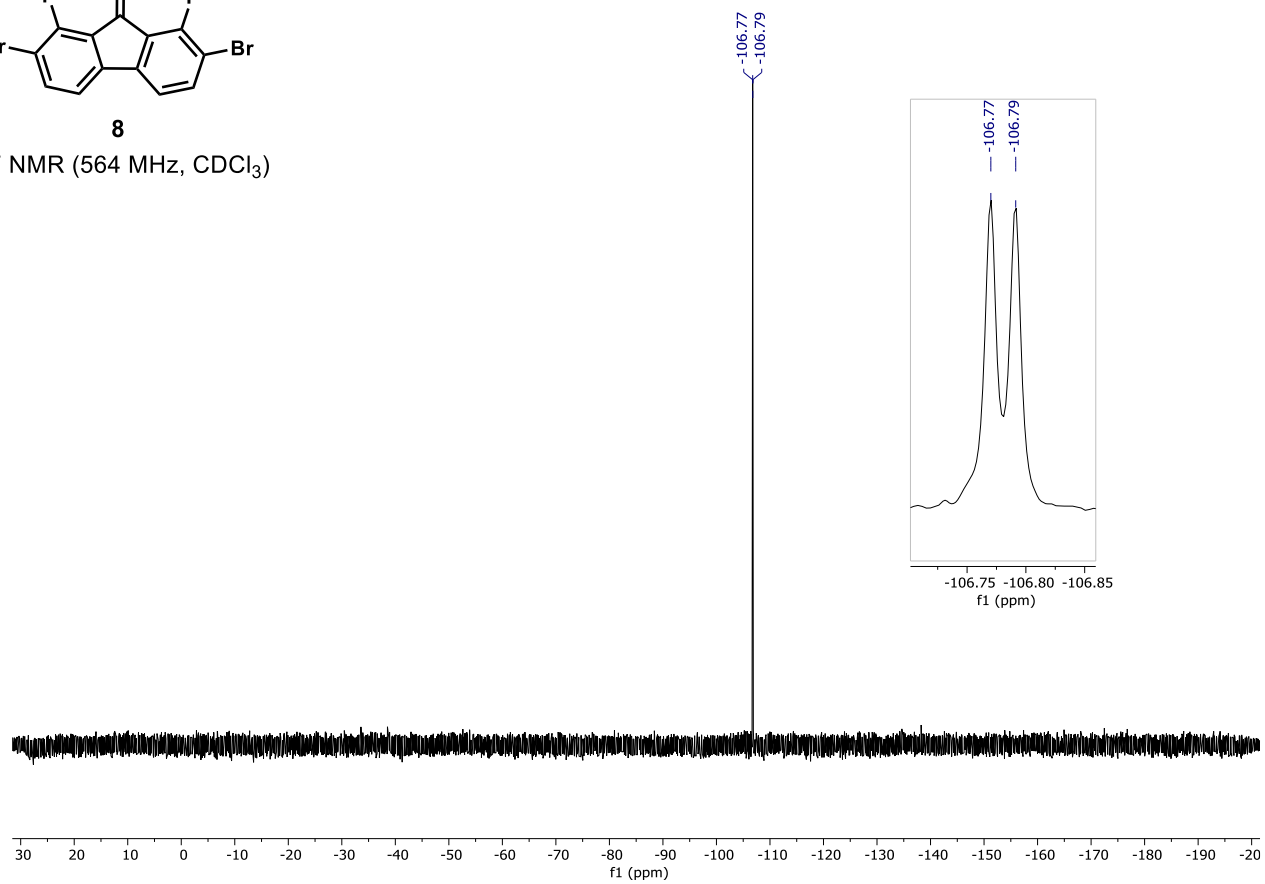



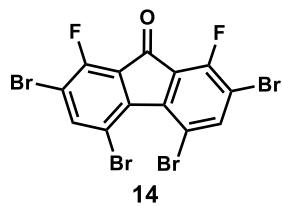

<sup>19</sup>F NMR (564 MHz, CDCl<sub>3</sub>)

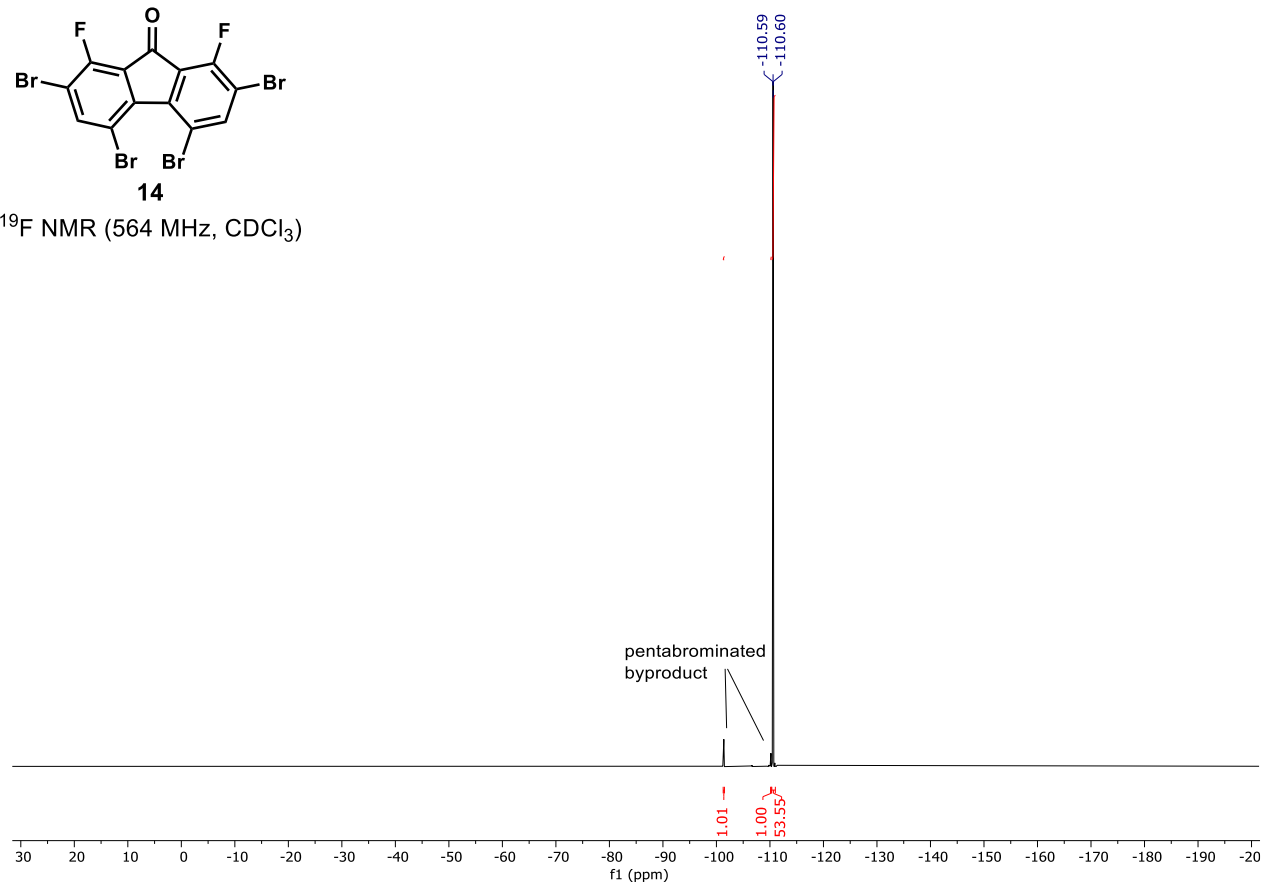



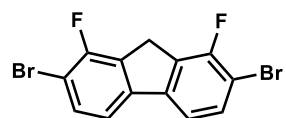

**10**

$^{19}\text{F}$  NMR (564 MHz,  $\text{CDCl}_3$ )

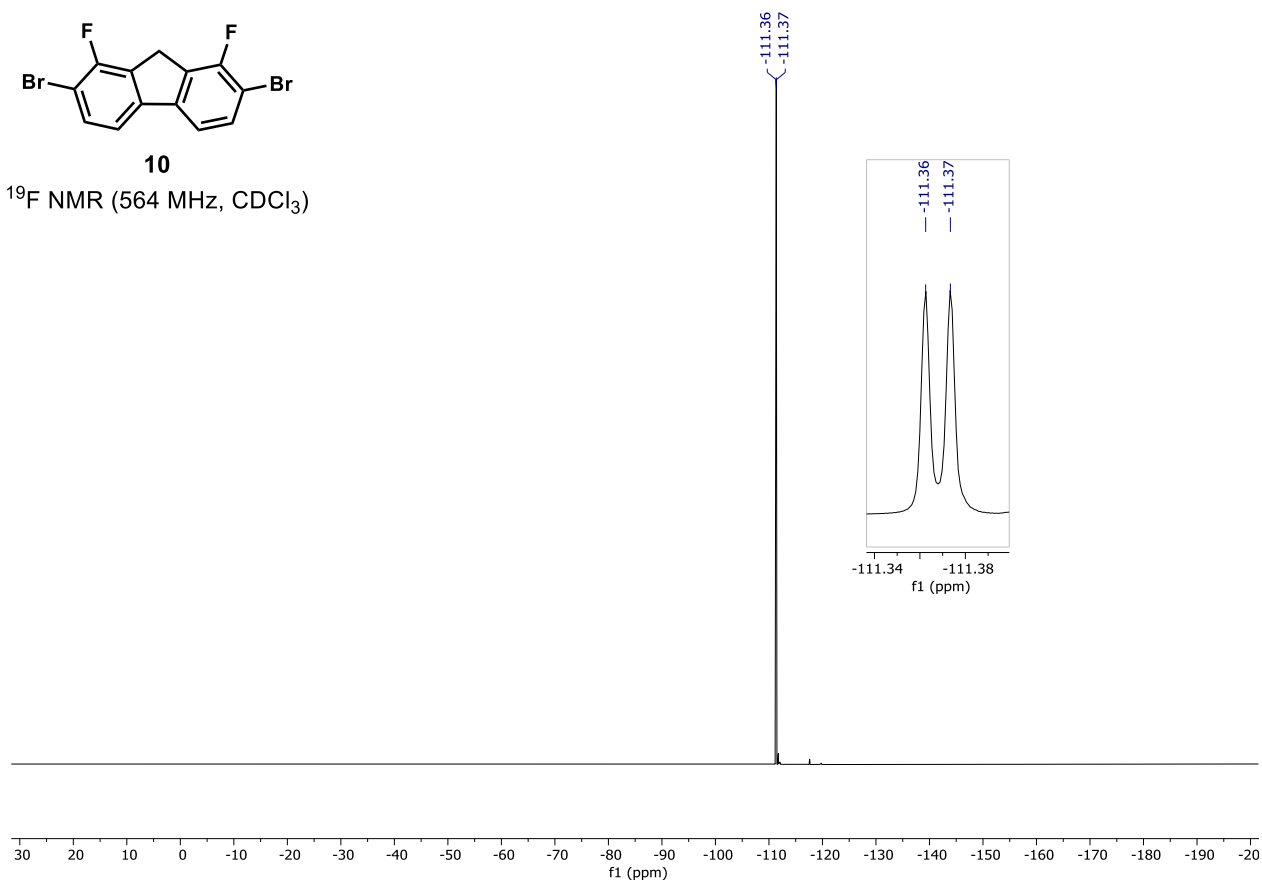



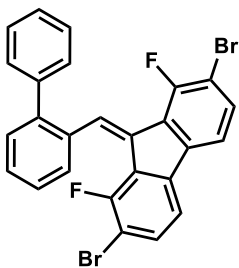

**12**

$^{19}\text{F}$  NMR (272 MHz,  $\text{CDCl}_3$ )

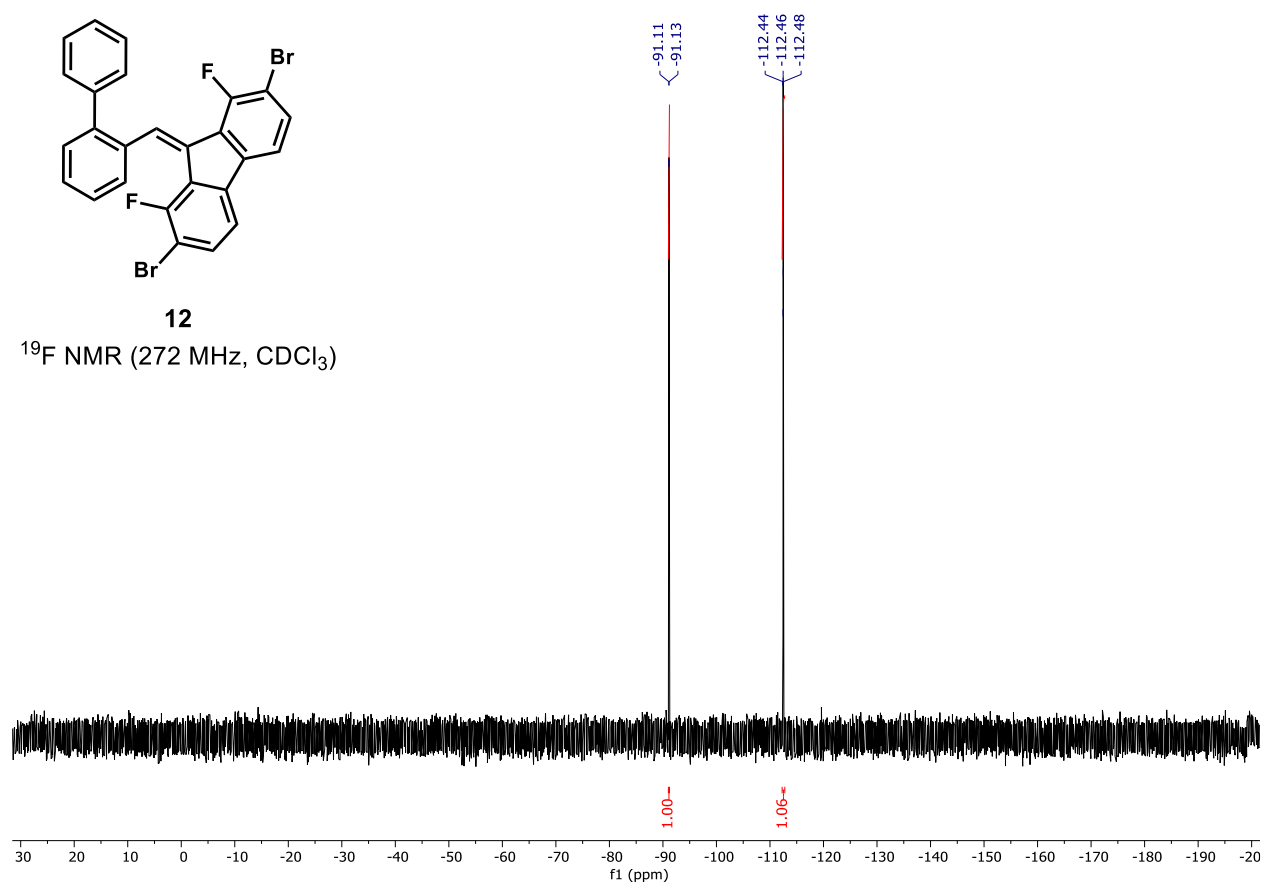



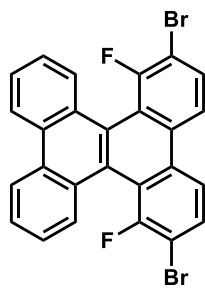

**13**

$^{19}\text{F}$  NMR (564 MHz,  $\text{CDCl}_3$ )

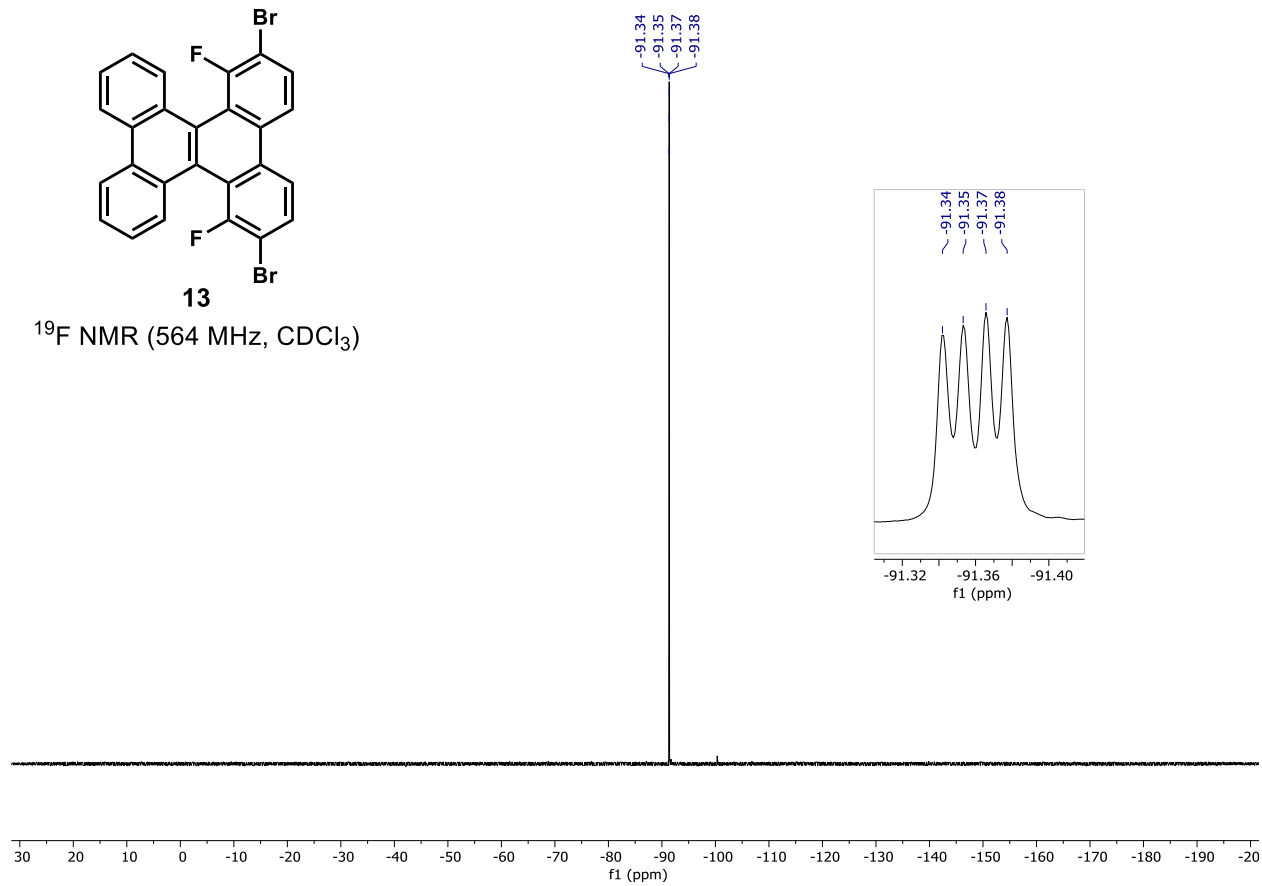

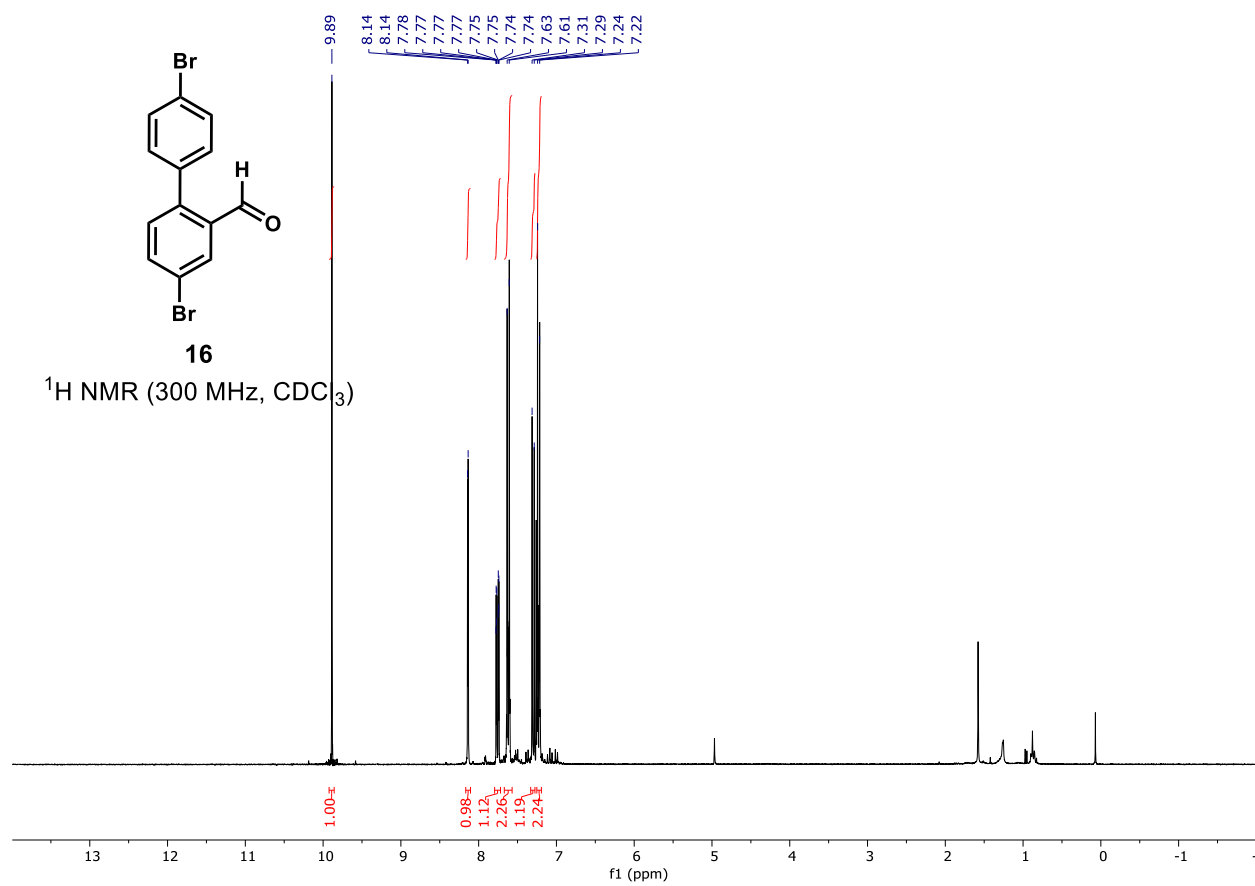



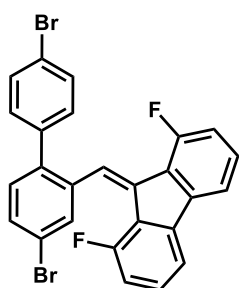

**18**

$^{19}\text{F}$  NMR (564 MHz,  $\text{CDCl}_3$ )

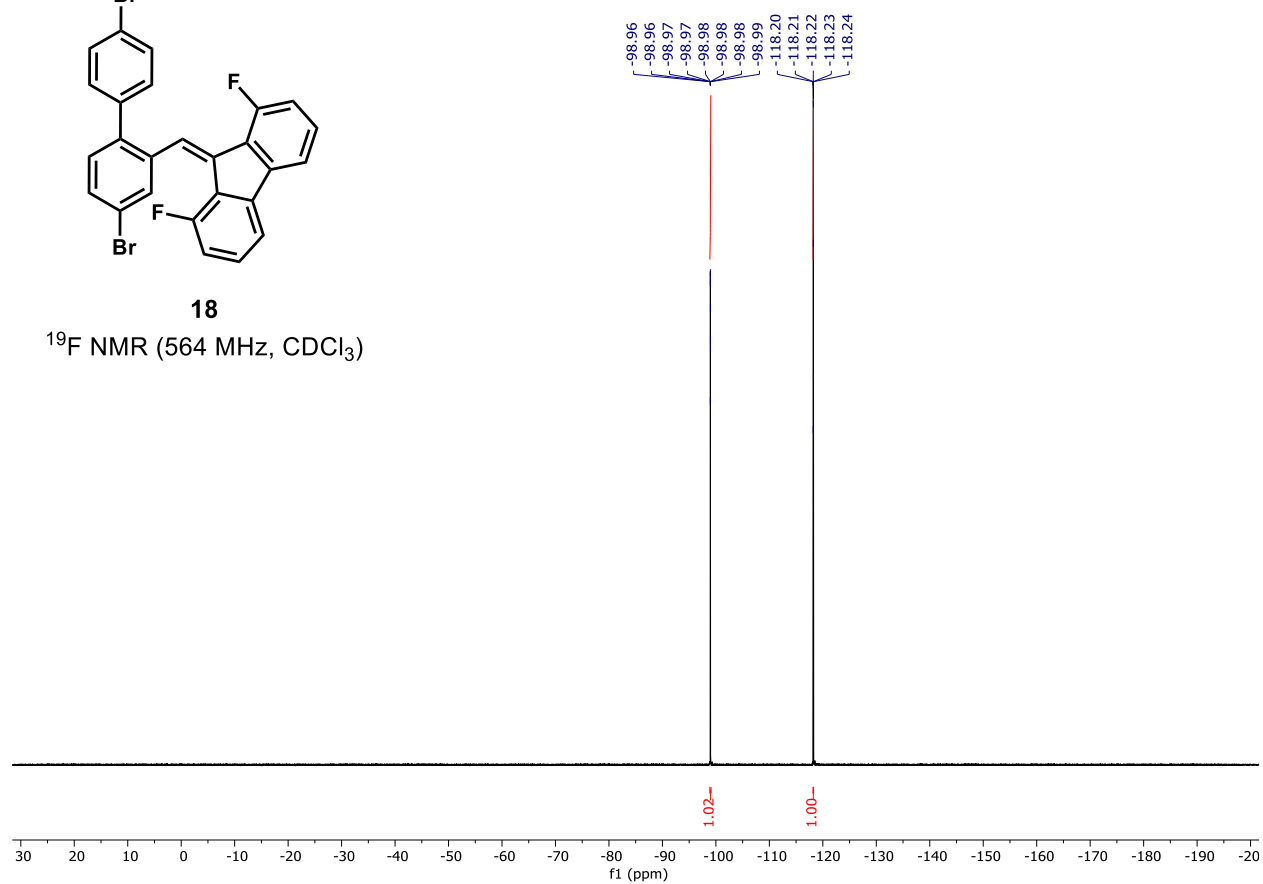



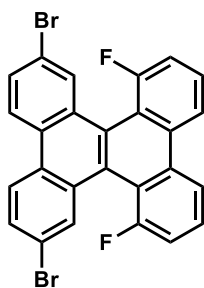

**19**

$^{19}\text{F}$  NMR (564 MHz,  $\text{CDCl}_3$ )

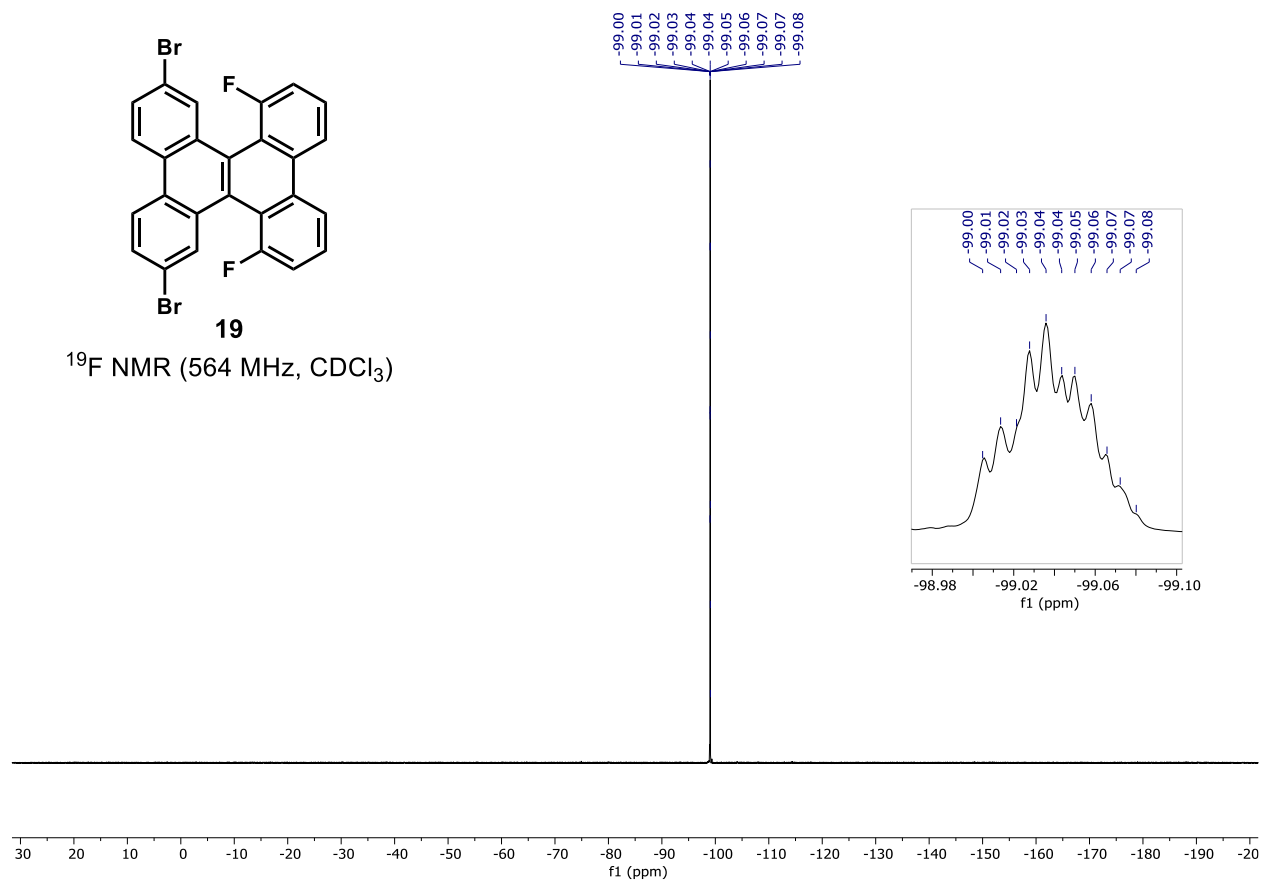

Supplement: d2ob01798a1.pdf [file d2ob01798a1.pdf]
